# Supplementary material for: Biochanin A Promotes Osteogenic but Inhibits Adipogenic Differentiation: Evidence with Primary Adipose-Derived Stem Cells
Source: Hindawi journal article supplement (doi:10.1155/2013/846039), 2013-01-01

## Supplementary data

M2-10B4

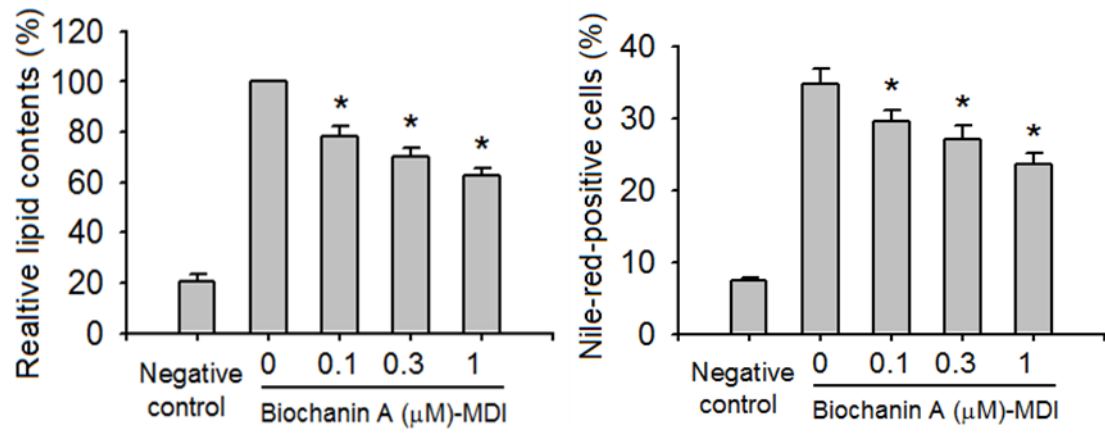

Supplement: f1 [file 846039.f1.pdf]
